# Supplementary material for: The impact of recreational marijuana commercialization on traumatic injury
Source: PubMed Central journal article supplement (PMC6360194; doi:10.1186/s40621-019-0180-4), 2019-02-04

# S1

## All Admissions- Colorado

Pre-commercialization | Post-commercialization

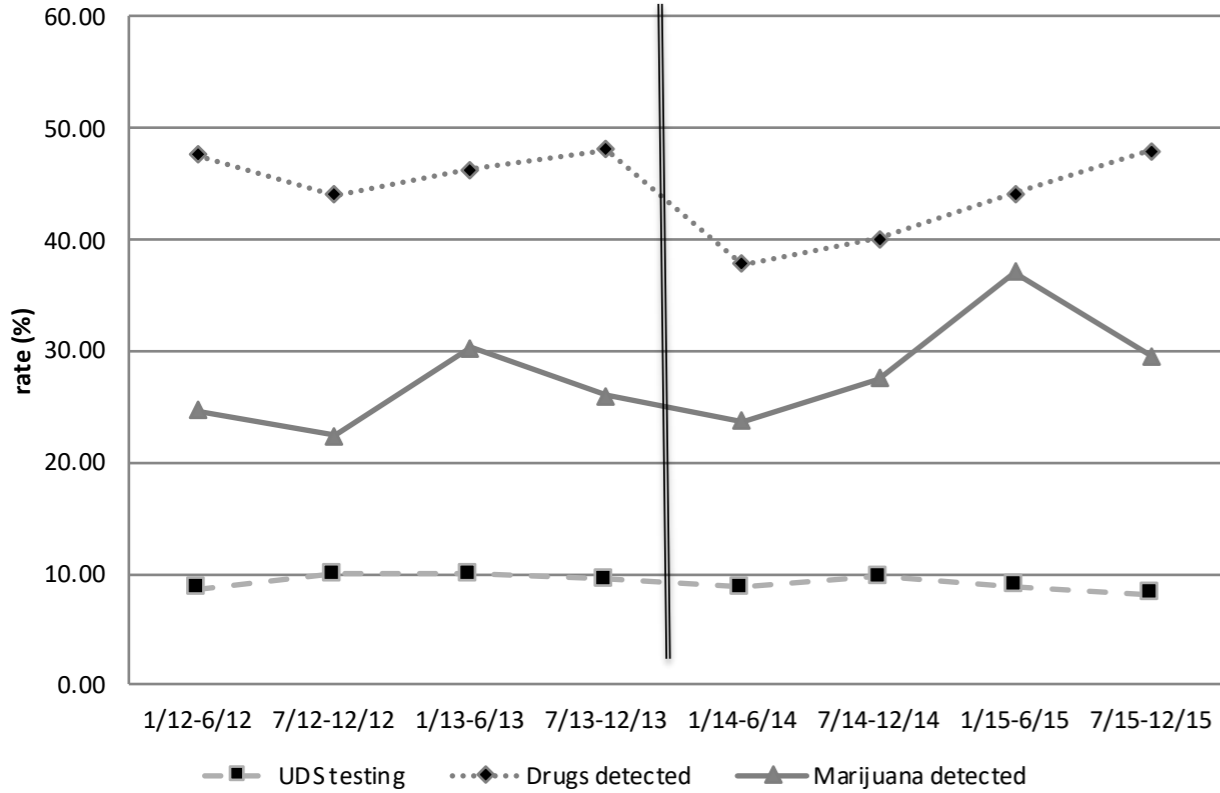

# S2

## MVCs - Colorado

Pre-commercialization | Post-commercialization

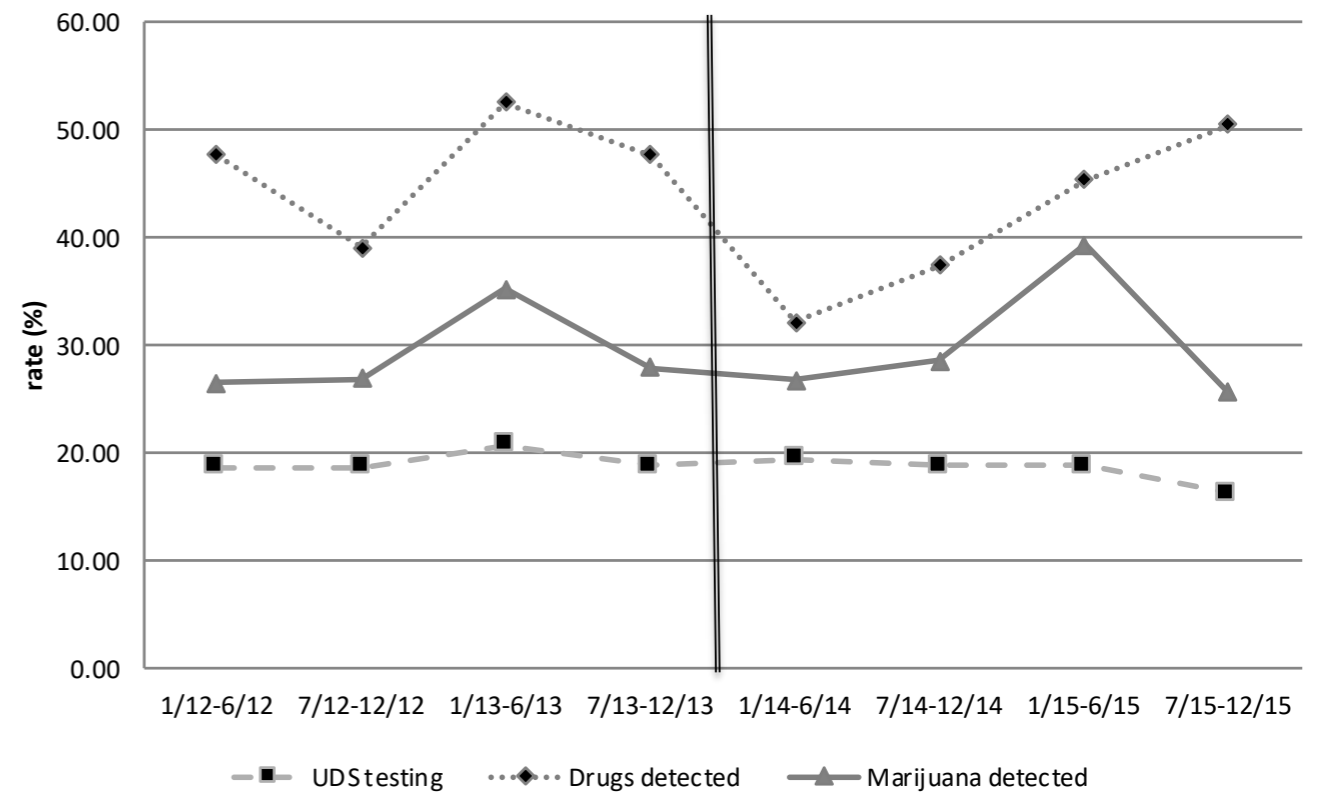

# S3

## All admissions- non Colorado

Pre-commercialization | Post-commercialization

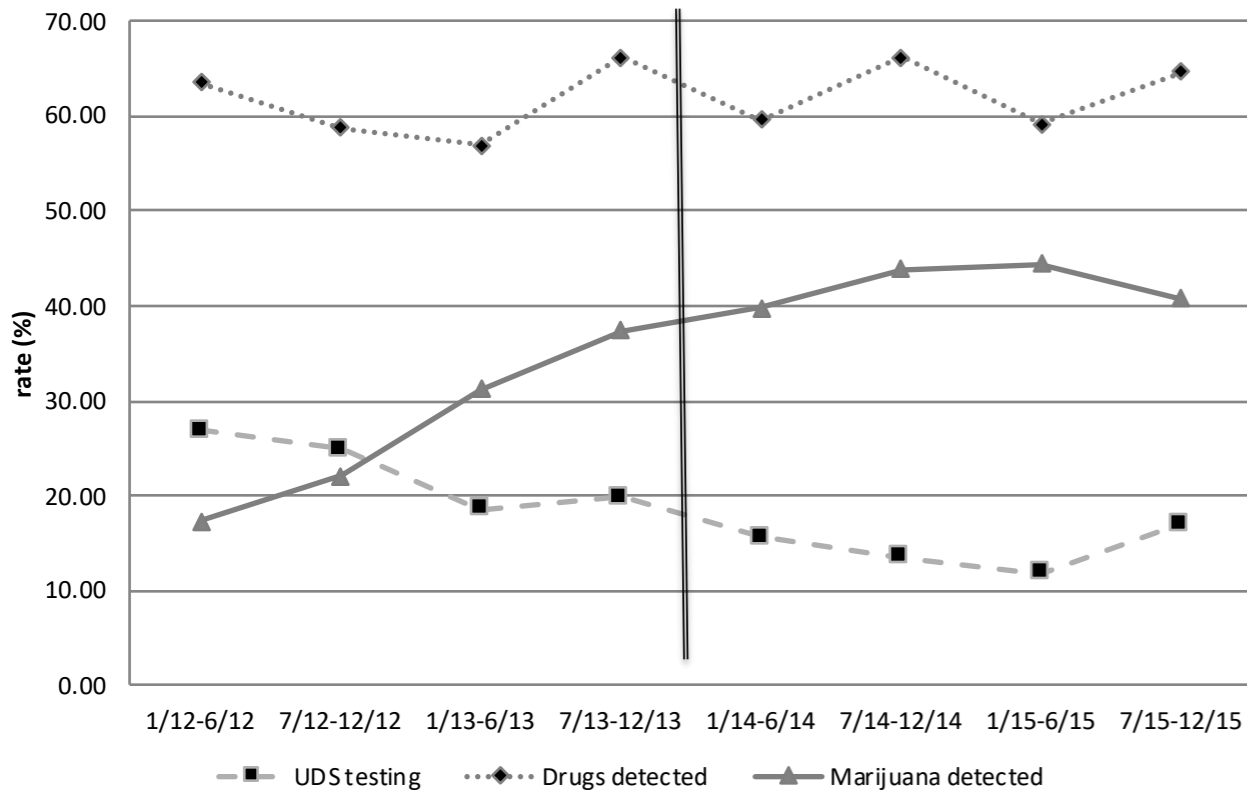

# S4

## MVCs - non Colorado

Pre-commercialization | Post-commercialization

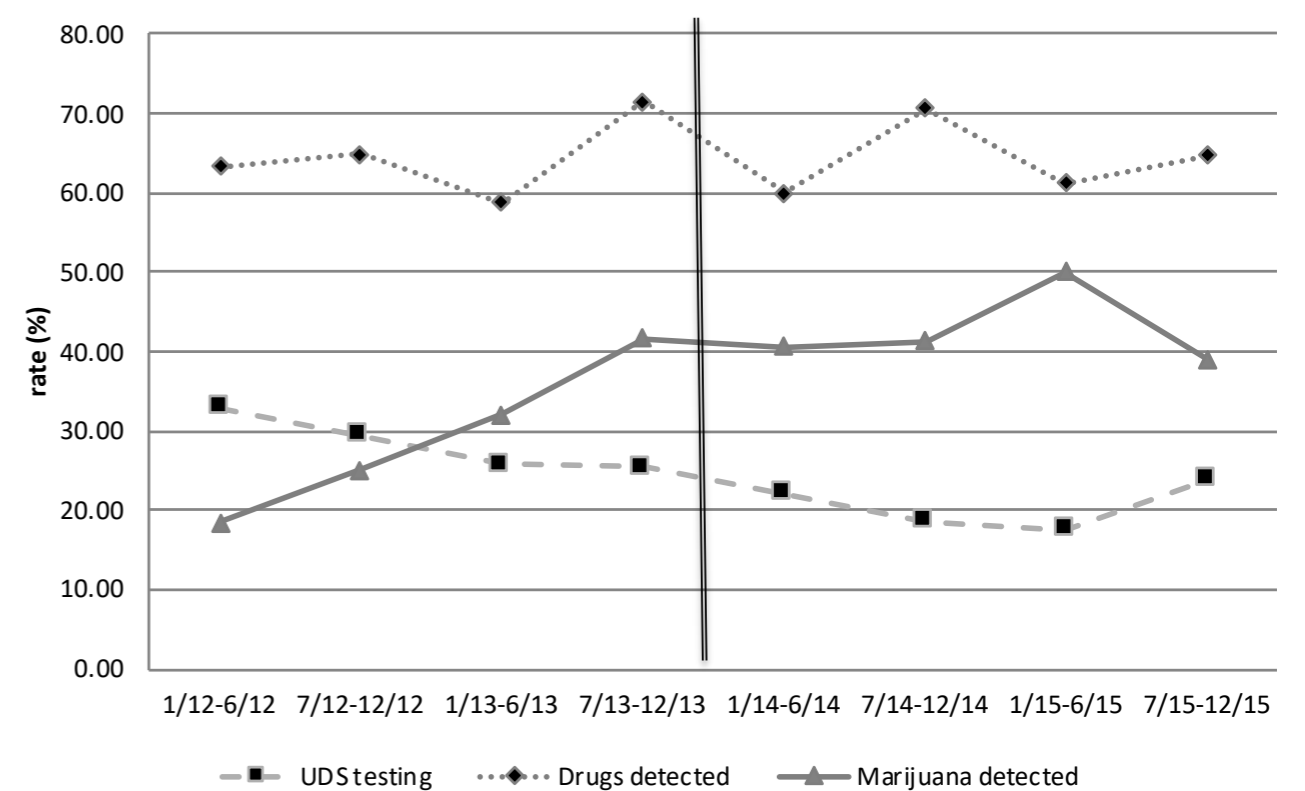

Supplement: 40621_2019_180_MOESM1_ESM.pdf [file 40621_2019_180_MOESM1_ESM.pdf]
